# Supplementary material for: A Novel Cuproptosis-Related Prognostic Gene Signature and Validation of Differential Expression in Clear Cell Renal Cell Carcinoma
Source: MDPI journal article supplement (doi:10.3390/genes13050851), 2022-05-10
Supplement: s1 [file s1]

**Table S1.** Results of differential expression of cuproptosis-related genes (CRGs) in various datasets

| Dataset   | Gene symbol | log2FoldChange | P value  |
|-----------|-------------|----------------|----------|
| TCGA-KIRC | CDKN2A      | 2.12           | #####    |
| TCGA-KIRC | DLAT        | -0.73          | 5.12E-26 |
| TCGA-KIRC | DLD         | -0.97          | 5.99E-47 |
| TCGA-KIRC | FDX1        | -1.07          | 9.21E-54 |
| TCGA-KIRC | GLS         | -0.94          | 2.85E-22 |
| TCGA-KIRC | LIAS        | 0.02           | 6.48E-01 |
| TCGA-KIRC | LIPT1       | 0.00           | 9.28E-01 |
| TCGA-KIRC | MTF1        | -0.29          | 1.38E-06 |
| TCGA-KIRC | PDHA1       | -1.14          | 7.17E-32 |
| TCGA-KIRC | PDHB        | -1.12          | 2.59E-46 |
| GSE40345  | CDKN2A      | 0.23           | 3.76E-19 |
| GSE40345  | DLAT        | -0.15          | 7.48E-05 |
| GSE40345  | DLD         | -0.51          | 3.02E-15 |
| GSE40345  | FDX1        | -0.47          | 3.30E-31 |
| GSE40345  | GLS         | -1.69          | 2.59E-48 |
| GSE40345  | LIAS        | -0.26          | 2.09E-17 |
| GSE40345  | LIPT1       | -0.02          | 5.06E-01 |
| GSE40345  | MTF1        | -0.05          | 1.81E-01 |
| GSE40345  | PDHA1       | -0.98          | 8.70E-45 |
| GSE40345  | PDHB        | -1.02          | 1.12E-61 |
| GSE53757  | CDKN2A      | 2.05           | 5.02E-27 |
| GSE53757  | DLAT        | -0.76          | 4.15E-21 |
| GSE53757  | DLD         | -0.80          | 2.15E-26 |
| GSE53757  | FDX1        | -1.52          | 3.10E-31 |
| GSE53757  | GLS         | -0.61          | 6.31E-14 |
| GSE53757  | LIAS        | -0.17          | 9.80E-03 |
| GSE53757  | LIPT1       | -0.17          | 1.18E-03 |

**Table S2.** Association results for cuproptosis-related genes derived from univariate and multivariate Cox proportional hazards model.

| CRGs   | crude model      |          | adjusted model   |          |
|--------|------------------|----------|------------------|----------|
|        | HR (95%CI)       | P value  | HR (95%CI)       | P value  |
| FDX1   | 0.47 (0.36-0.62) | 5.64E-08 | 0.54 (0.41-0.71) | 1.56E-05 |
| LIPT1  | 0.72 (0.54-0.97) | 3.19E-02 | 0.88 (0.64-1.22) | 4.42E-01 |
| LIAS   | 0.58 (0.44-0.76) | 6.97E-05 | 0.84 (0.63-1.13) | 2.57E-01 |
| DLD    | 0.64 (0.53-0.78) | 5.98E-06 | 0.74 (0.6-0.91)  | 4.10E-03 |
| DLAT   | 0.57 (0.47-0.7)  | 2.18E-08 | 0.66 (0.54-0.82) | 1.68E-04 |
| PDHA1  | 0.61 (0.45-0.82) | 1.33E-03 | 0.77 (0.56-1.06) | 1.07E-01 |
| PDHB   | 0.54 (0.39-0.74) | 1.05E-04 | 0.7 (0.51-0.96)  | 2.91E-02 |
| MTF1   | 0.69 (0.57-0.83) | 1.34E-04 | 0.76 (0.61-0.94) | 1.01E-02 |
| GLS    | 0.82 (0.67-1)    | 5.55E-02 | 0.82 (0.66-1.03) | 8.33E-02 |
| CDKN2A | 1.35 (1.13-1.6)  | 8.35E-04 | 1.21 (1.01-1.45) | 3.52E-02 |

**Table S3.** Association results of the cuproptosis-related gene signature of subgroup (age, gender and pathologic stage) derived from Cox proportional hazards model

| Subgroup         | OS               |                | PFS              |                |
|------------------|------------------|----------------|------------------|----------------|
|                  | HR (95%CI)       | <i>P</i> value | HR (95%CI)       | <i>P</i> value |
| Age              |                  |                |                  |                |
| age<65           | 2.96 (1.91-4.59) | 1.29E-06       | 3.00 (2.00-4.50) | 1.23E-07       |
| age≥65           | 2.38 (1.56-3.63) | 6.19E-05       | 2.78 (1.71-4.54) | 4.18E-05       |
| Gender           |                  |                |                  |                |
| Female           | 2.79 (1.78-4.38) | 8.35E-06       | 3.01 (1.75-5.16) | 6.67E-05       |
| Male             | 2.71 (1.80-4.08) | 1.81E-06       | 2.70 (1.85-3.94) | 2.82E-07       |
| Pathologic stage |                  |                |                  |                |
| Early (I-II)     | 2.20 (1.28-3.79) | 4.58E-03       | 3.25 (1.82-5.81) | 6.73E-05       |
| Late (III-IV)    | 2.18 (1.45-3.27) | 1.61E-04       | 1.61 (1.06-2.44) | 2.48E-02       |

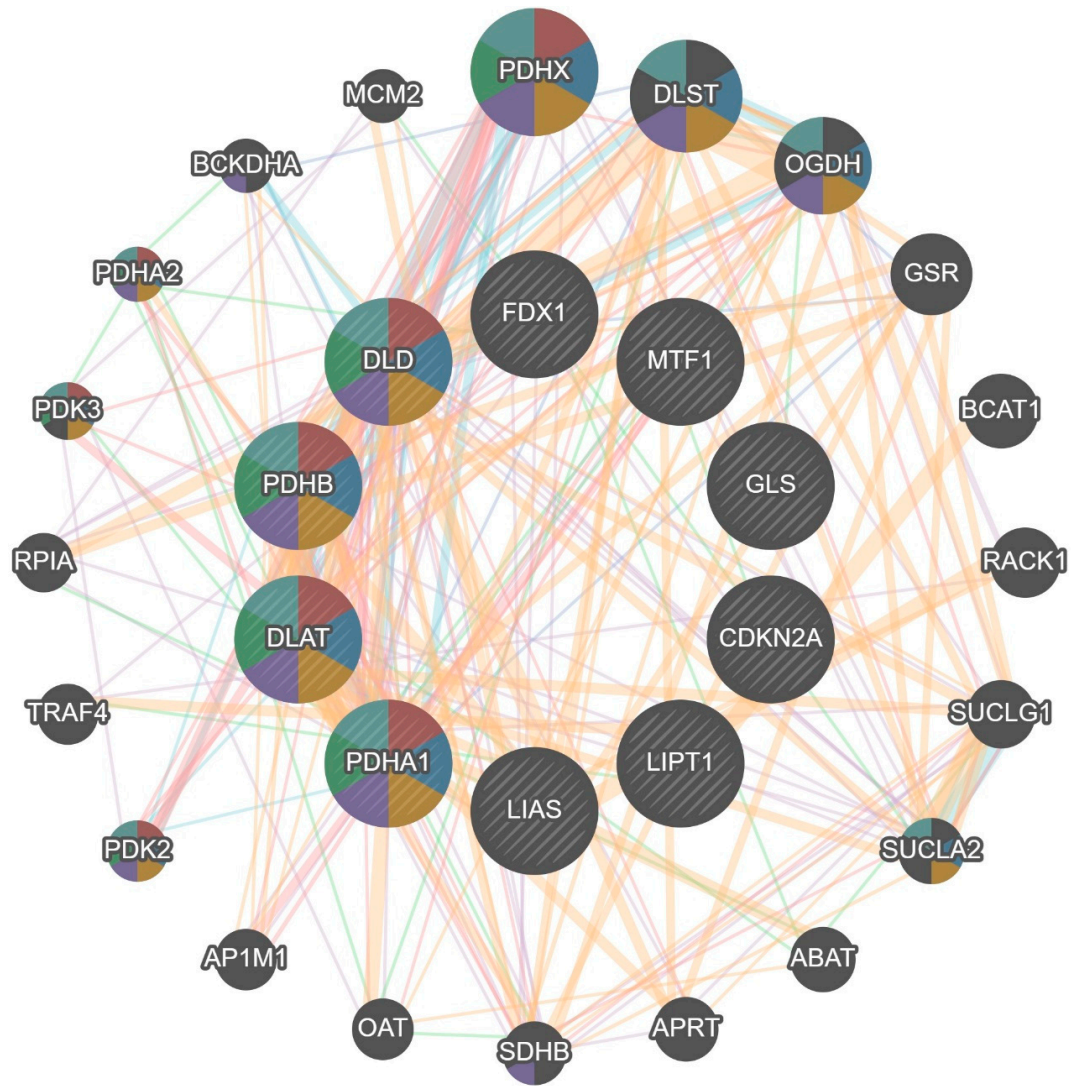

**Figure S1.** Protein–Protein Interaction (PPI) of cuproptosis-related genes (CRGs)
